# Education Directory

## ARIZONA

Phoenix

### **CCRN/PCCN Certification Review Course**

*Date:* May 28, 2020 and June 4, 2020. *Place:* HonorHealth Deer Valley Medical Center Debs Conference Room.

*Address:* 19829 North 27th Ave, Phoenix, AZ 85027

*Keynote Speakers:* Tracy Thomas, Norma Barlow.

*Sponsor:* Greater Phoenix Area Chapter of AACN.

*Contact:* Christen Stevens. *Phone:* 480-583-0653.

*Email:* cstevens@honorhealth.com. *Fee:* \$75 member; \$125 nonmember.

## FLORIDA

Gainesville

### **CCRN Review Course**

*Date:* June 6-7, 2020. *Place:* UF Health-South Tower.

*Address:* 1515 SW Archer Rd, Gainesville, FL 32608.

Auxiliary Rooms 1204 and 1205, 1st Floor. *Keynote*

*Speaker:* Mary Ann "Cammie" Christie. *Sponsor:* North

Central Florida Chapter of AACN. *Contact:* Dironada

Strange. *Phone:* 352-256-4412. *Email:* ncfchapter.aacn@

gmail.com. *Fee:* \$150 member; \$220 nonmember.

Gainesville

### **CCRN Review Course**

*Date:* November 14-15, 2020. *Place:* UF Health-South Tower. *Address:* 1515 SW Archer Rd, Gainesville, FL

32608. *Keynote Speaker:* Mary Ann "Cammie" Christie.

*Sponsor:* North Central Florida Chapter of AACN.

*Contact:* Dironada Strange. *Phone:* 352-256-4412.

*Email:* ncfchapter.aacn@gmail.com. *Fee:* \$150 member; \$220 nonmember.

## GEORGIA

Savannah

### **Pediatric CCRN Review Course**

*Date:* June 8-9 2020. *Place:* Memorial Health University Medical Center, Med-ED Auditorium, Building 300.

*Address:* 4700 Waters Ave, Savannah, GA 31404. *Keynote*

*Speaker:* Susan Wade. *Sponsor:* Greater Savannah Area

Chapter of AACN. *Contact:* Diana Magnan. *Phone:*

843-505-1562. *Email:* Diana.Magnan@HCAhealthcare.

*com. Fee:* \$200 HCA employee; \$250 HCA guest.

---

For AJCC Education Directory submission information  
phone (800) 809-2273, ext 532; or e-mail [ajcc@aacn.org](mailto:ajcc@aacn.org).
